# Supplementary material
Source: Springer Nature journal article supplement (https://www.springermedizin.de/resource/supplementary/12891_2013_1873_MOESM1_ESM.pdf/9508680)
Supplement: MOESM1 [file 9508680]

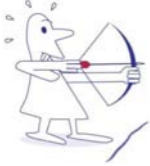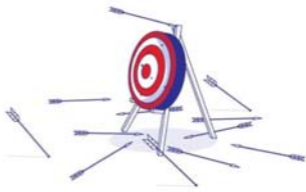

A. Maintenance of goals

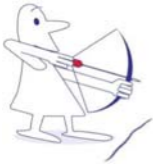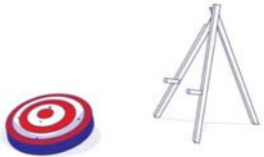

B. Adjustment of goals

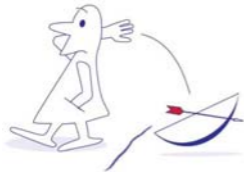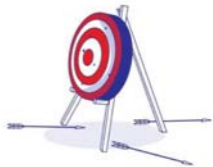

C. Disengagement of goals

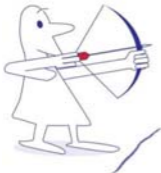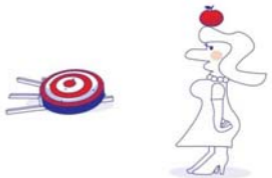

D. Reengagement in new goals
